# Supplementary material for: Exposure to Yeast Shapes the Intestinal Bacterial Community Assembly in Zebrafish Larvae
Source: PubMed Central journal article supplement (PMC6103253; doi:10.3389/fmicb.2018.01868), 2018-08-14

# **Exposure to yeast shapes the intestinal bacterial community assembly in zebrafish larvae**

Prabhugouda Siriyappagouder<sup>1</sup>, Jorge Galindo-Villegas<sup>2</sup>, Jep Lokesh<sup>1</sup>,

Victoriano Mulero<sup>2</sup>, Jorge Fernandes\*<sup>1</sup> and Viswanath Kiron\*<sup>1</sup>

*<sup>1</sup>Faculty of Biosciences and Aquaculture, Nord University, 8049 Bodø, Norway*

*<sup>2</sup>Department of Cell Biology and Histology, Faculty of Biology, Institute of Biomedical Research of Murcia-Arrixaca. Campus Universitario de Espinardo. University of Murcia, 30100 Murcia, Spain*

### Supplementary figure legends

**FIGURE S1.** Rarefaction curves for the species richness of the intestinal bacteria in zebrafish larvae. The curves were generated by plotting the number of species against the number of sequences per sample. The shaded portion around each line represents the 95% confidence interval. Colour codes and the respective samples are: Royal blue – CRC (n = 7), yellow green – CRD (n = 9), orange red – CRP (n = 9), navy blue – GFC (n = 7), yellow – GFD (n = 6), maroon – GFP (n = 7) and sky blue – water samples (n = 17, from all the treatments and zebrafish facility).

**FIGURE S2.** Relative abundance of the core microbiota in the intestine of zebrafish larvae. Prevalence and detection thresholds of 0.97 and 0.2, respectively were used to determine the core microbiota. Conventionally-raised control– CRC, conventionally-raised *Debaryomyces*-exposed– CRD, conventionally-raised *Pseudozyma*-exposed– CRP, germ-free control– GFC, germ-free *Debaryomyces*-exposed– GFD, and germ-free *Pseudozyma*-exposed– GFP.

**FIGURE S3.** Relative abundance of the top 20 abundant taxa (OTUs) among the intestinal bacterial communities of zebrafish larvae. Classes (A), orders (B) and families (C). Shades of purple and pink are given for the phylum Proteobacteria, and green for Bacteroidetes. Conventionally-raised control– CRC, conventionally-raised *Debaryomyces*-exposed– CRD, conventionally-raised *Pseudozyma*-exposed– CRP, germ-free control– GFC, germ-free *Debaryomyces*-exposed– GFD, and germ-free *Pseudozyma*-exposed– GFP.

**FIGURE S4.** Composition and diversity of the intestinal bacterial communities of the conventionally-raised (CR) and germ-free (GF) zebrafish larvae from the control group. Principal coordinate analysis plot based on weighted UniFrac distance metric (A). Ellipses are drawn include 95% of samples from a normally distributed data. Species richness (B), Shannon diversity (C), Simpson diversity (D), phylogenetic diversity (E) and core abundance (F).

**FIGURE S5.** Relative abundance of bacterial classes in the intestine of zebrafish larvae and water samples. CRCW, CRDW and CRPW represent the water samples collected from their respective flasks/tanks on day 2, 3, 7 and 14. GFCW, GFDW and GFPW represent the water samples collected only on day 14. ZSW represents the water samples collected from the zebrafish facility on day 7 and 14.

Figure S1.

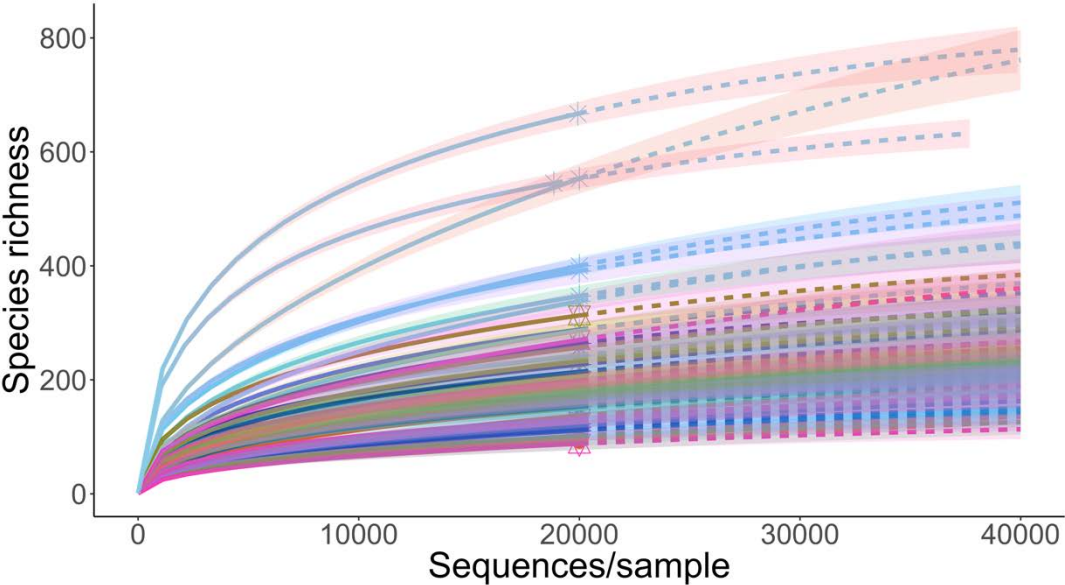

**Figure S2.**

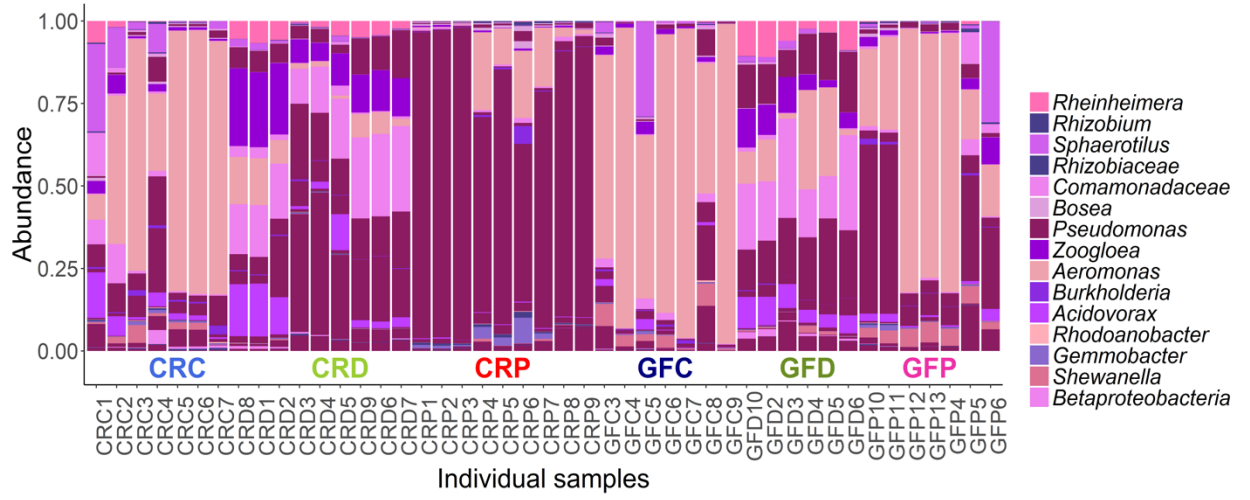

**Figure S3.**

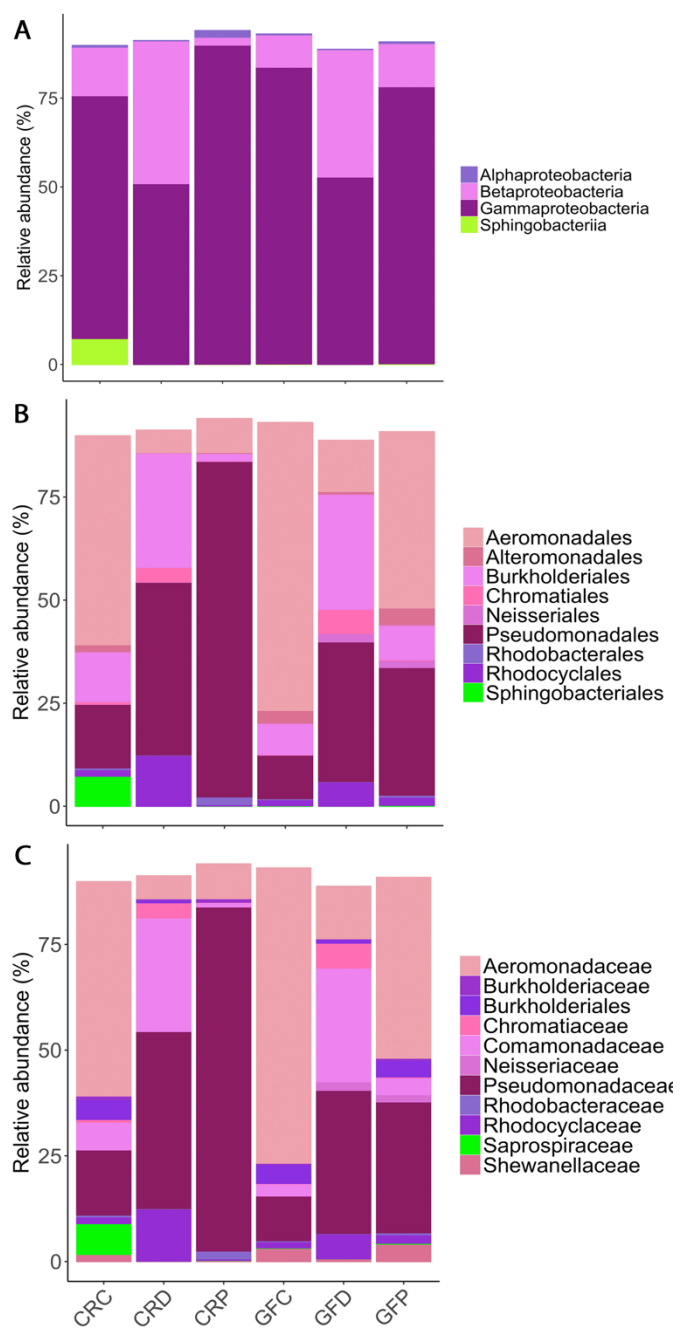

**Figure S4.**

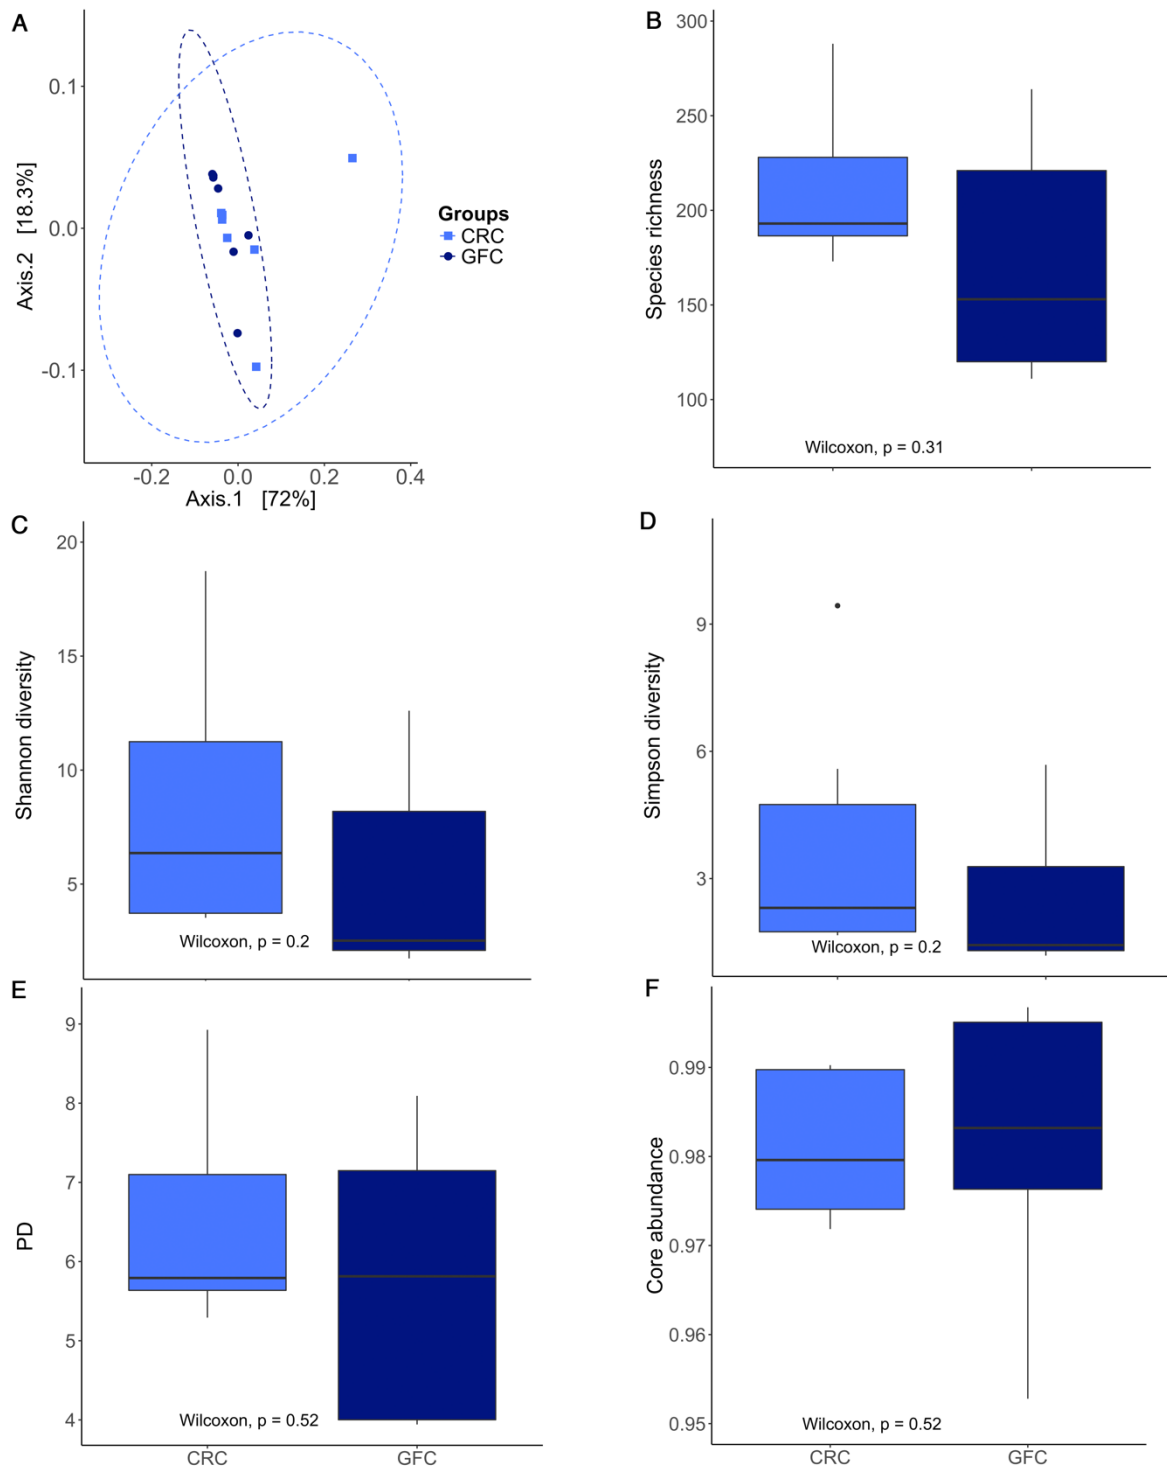

**Figure S5.**

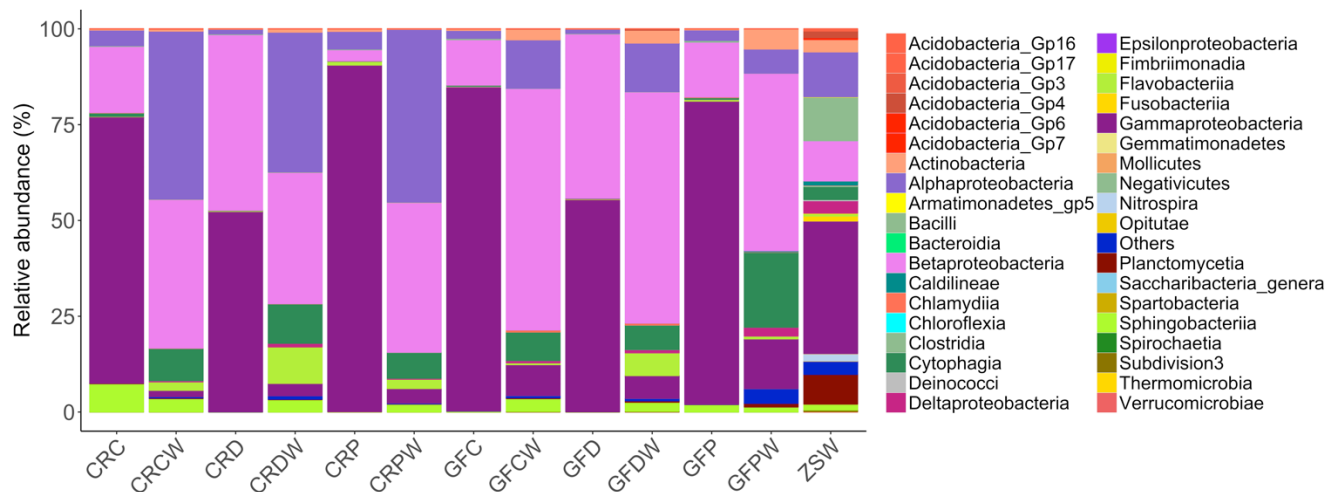

Supplement: Data_Sheet_2.pdf [file Data_Sheet_2.pdf]
