# Supplementary material for: Exposure to Yeast Shapes the Intestinal Bacterial Community Assembly in Zebrafish Larvae
Source: PubMed Central journal article supplement (PMC6103253; doi:10.3389/fmicb.2018.01868), 2018-08-14
Supplement: Data_Sheet_1.pdf [file Data_Sheet_1.pdf]

# **Exposure to yeast shapes the intestinal bacterial community assembly in zebrafish larvae**

Prabhugouda Siriyappagouder<sup>1</sup>, Jorge Galindo-Villegas<sup>2</sup>, Jep Lokesh<sup>1</sup>,

Victoriano Mulero<sup>2</sup>, Jorge Fernandes\*<sup>1</sup> and Viswanath Kiron\*<sup>1</sup>

*<sup>1</sup>Faculty of Biosciences and Aquaculture, Nord University, 8049 Bodø, Norway*

*<sup>2</sup>Department of Cell Biology and Histology, Faculty of Biology, Institute of Biomedical Research of Murcia-Arrixaca. Campus Universitario de Espinardo. University of Murcia, 30100 Murcia, Spain*

Table S1. Statistics of raw reads and trimmed reads of all the samples

| Sample Id | Raw sequences | After quality trimming |
|-----------|---------------|------------------------|
| CRC1      | 54526         | 50177                  |
| CRC2      | 56431         | 54390                  |
| CRC3      | 37938         | 34478                  |
| CRC4      | 48632         | 44342                  |
| CRC5      | 51821         | 50317                  |
| CRC6      | 58478         | 54510                  |
| CRC7      | 51658         | 45989                  |
| CRD1      | 128488        | 113093                 |
| CRD2      | 54472         | 48934                  |
| CRD3      | 75894         | 68279                  |
| CRD4      | 127404        | 111224                 |
| CRD5      | 148658        | 113301                 |
| CRD6      | 123899        | 106484                 |
| CRD7      | 96223         | 79999                  |
| CRD8      | 78816         | 71752                  |
| CRD9      | 90852         | 80822                  |
| CRP1      | 53603         | 51498                  |
| CRP2      | 124062        | 120184                 |
| CRP3      | 126043        | 121075                 |
| CRP4      | 67475         | 62295                  |
| CRP5      | 171474        | 159506                 |
| CRP6      | 43049         | 39672                  |
| CRP7      | 101108        | 96184                  |
| CRP8      | 98585         | 92435                  |
| CRP9      | 114573        | 108534                 |
| GFC3      | 35949         | 34162                  |
| GFC4      | 43949         | 40974                  |
| GFC5      | 43919         | 40550                  |
| GFC6      | 42610         | 40292                  |
| GFC7      | 48266         | 46006                  |
| GFC8      | 42014         | 36986                  |
| GFC9      | 120002        | 113035                 |
| GFD10     | 36666         | 34379                  |
| GFD2      | 67269         | 57993                  |
| GFD3      | 137165        | 123530                 |
| GFD4      | 48052         | 44114                  |
| GFD5      | 79478         | 73898                  |

|              |                |                |
|--------------|----------------|----------------|
| GFD6         | 88528          | 79983          |
| GFP10        | 28470          | 21995          |
| GFP11        | 53220          | 47814          |
| GFP12        | 145222         | 138178         |
| GFP13        | 140247         | 131555         |
| GFP4         | 30553          | 28287          |
| GFP5         | 32560          | 29966          |
| GFP6         | 48805          | 46578          |
| CRC14W       | 243336         | 218264         |
| CRC2W        | 97713          | 87535          |
| CRC3W        | 83013          | 75163          |
| CRC7W        | 106138         | 97403          |
| CRD14W       | 155046         | 145734         |
| CRD2W        | 107065         | 97035          |
| CRD3W        | 101635         | 89833          |
| CRD7W        | 61324          | 55498          |
| CRP14W       | 219045         | 202215         |
| CRP2W        | 109509         | 99762          |
| CRP3W        | 73035          | 66023          |
| CRP7W        | 68900          | 63447          |
| GFC14W       | 139092         | 128806         |
| GFD14W       | 219683         | 202688         |
| GFP14W       | 123267         | 111824         |
| SW14         | 108891         | 99781          |
| SW7          | 136839         | 119770         |
| <b>Total</b> | <b>5650637</b> | <b>5150530</b> |
